# Supplementary material
Source: Springer Nature journal article supplement (https://www.springermedizin.de/resource/supplementary/12871_2014_310_MOESM4_ESM.pdf/9429328)

# Global Hb change: end of anesthesia –preop value

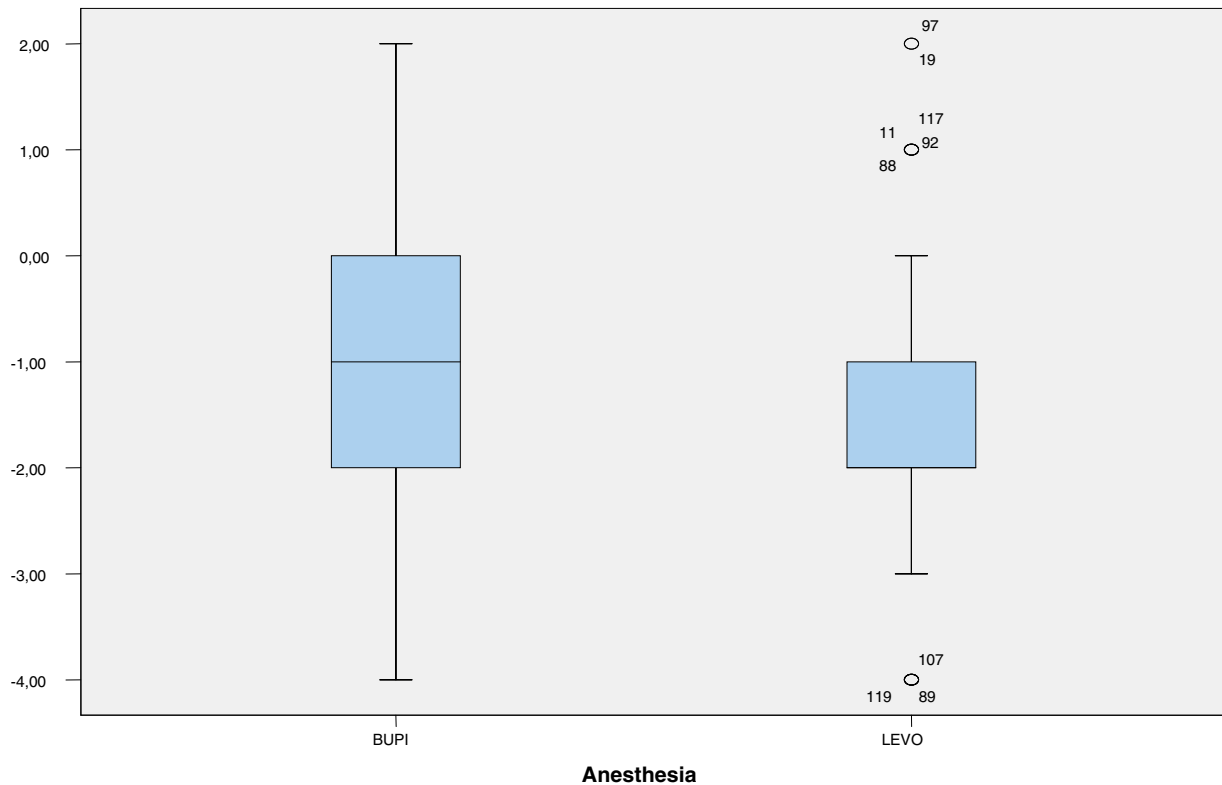

Supplement: MOESM4 [file 9429328]
